## Sperm-egg fusion disorder in a Chinese male patient was associated with a rare *ADAM20* variant

Yan-Wei Sha<sup>1,\*</sup>, Xiaohui Xu<sup>2,\*</sup>, Zhi-Yong Ji<sup>1,\*</sup>, Li-Bin Mei<sup>1</sup>, Ping-Ping Qiu<sup>1</sup>, Hong Ji<sup>1</sup>, Ping Li<sup>1</sup>, Lin Li<sup>3</sup> and Wei-Wu Liu<sup>4</sup>

<sup>1</sup>Department of Reproductive Medicine, Xiamen Maternity and Child Care Hospital, Xiamen, Fujian 361005, China

<sup>2</sup>School of Pharmaceutical Sciences, Xiamen University, Xiamen, Fujian 361005, China

<sup>3</sup>Central Laboratory, Beijing Obstetrics and Gynecology Hospital, Capital Medical University, Chaoyang, Beijing 100026, China

<sup>4</sup>Department of Radiology, the 2nd Hospital Affiliated to Jilin University

\*These authors contributed equally to this work

Correspondence to: Lin Li, email: linlithu@163.com

Wei-Wu Liu, email: liuweiwu2001818@sohu.com

**Keywords:** Sperm-egg fusion; *ADAM20*; whole-exome sequencing; *in vitro* fertilization

**Received:** May 24, 2017

**Accepted:** December 13, 2017

**Published:** December 16, 2017

**Copyright:** Sha et al. This is an open-access article distributed under the terms of the Creative Commons Attribution License 3.0 (CC BY 3.0), which permits unrestricted use, distribution, and reproduction in any medium, provided the original author and source are credited.

### ABSTRACT

**We report here a 28-year-old male with infertility. No abnormality was found in his semen examination. The couple achieved a successful pregnancy under the help of intracytoplasmic sperm injection during which we found that sperm could enter the zona pellucida, but could not fuse with the egg within the short insemination period. We then performed whole-exome sequencing technology on this patient and found a rare variant (c.641A>C:p.D214A) in *ADAM20*, which encoded a disintegrin and metalloprotease 20 protein. To further verify the pathogenicity of this variant, we analyzed *ADAM20* protein expression in spermatozoa by immunostaining analysis, which showed a mis-localization of *ADAM20* in the patient's spermatozoa. Therefore, we concluded that mutation in *ADAM20* may be associated with sperm-egg fusion disorder in this patient.**

### INTRODUCTION

Fertilization is a complex process involving many molecules. Sperm-egg fusion is one of the most critical events in sexual reproduction. The sperm is activated in the female reproductive tract after capacitation, resulting in modification of the membrane composition and enhancement of membrane fluidity, leading to sperm hyperactivation. Sperm will then reach the cumulus, pass through layers of cumulus cells, and bind to the zona pellucida (ZP), triggering the acrosome reaction. The acrosome reaction releases a large number of enzymes that hydrolyze the local ZP such that the sperm can pass through and enter the perivitelline space. The acrosome reaction also exposes the acrosome intima and alters the equatorial region and the membrane components of the post-acrosomal region [1]. Having reached the perivitelline space between the egg ZP and plasma membrane, sperm

binds to and fuses with the plasma membrane at the equatorial region [2].

Binding of sperm to the egg plasma membrane is thought to be mediated by A Disintegrin-like And Metalloproteinase-containing proteins (ADAMs) [3], Izumo sperm-egg fusion proteins (IZUMOs) [4], cysteine-rich secretory proteins (CRISPs) [5], and mannose-ligand receptor [6]. ADAM proteins which anchored to the cell membrane, are a class of cell surface proteins that contain four conserved domains: the proteolysis domain, adhesion domain, fusion domain, and intracellular signal domain. These proteins are sperm membrane proteins expressed in the testes and are thought to play important roles in sperm-egg binding and sperm-egg membrane fusion [3]. The extracellular portion of ADAM1 in recombinant rats can be combined with the microvillar region of mouse oocytes and inhibit sperm-egg binding [7]. Human ADAM20 and ADAM1 have several common features [8], including the

same metalloprotease activity and a conserved predicted fusion polypeptide active site. However, the only human *ADAM1* gene (also known as fertilin  $\alpha$ ) is non-functional [9]. Therefore, the questions about which gene play an important role in human sperm-egg fusion, and whether *ADAM20* is involved in this process remain unclear. Until now, no study has reported the association of *ADAM20* mutations with male infertility.

In this paper, we report a patient with sperm-egg fusion disorder harbored a heterozygous *ADAM20* rare variant. The localization of *ADAM20* protein was presented as ring-structure and acrosome staining in the normal spermatozoa, while in the sperm of patient the ring-structure and acrosome staining of *ADAM20* disappeared. As far as we know, this is the first study to report the genetic alteration of sperm-egg fusion disorder in human.

## RESULTS

### Patient with sperm-egg fusion disorder

In our practice, we encountered a male patient (28 years of age, married in 2012) who had normal erection, ejaculation, and sexual activity (2–3 times per week). However, despite not using contraception, his wife had not become pregnant. His parents were not consanguineous, and his sister had given birth to two healthy babies (Figure 1A). The patient was employed in the field of computer maintenance and had no history of hazardous environmental exposure or poor habits such as smoking or drinking. Physical examination results were as follows: height, 168 cm; weight, 70 kg; external genital development, normal; and bilateral testicular size and bilateral spermatic vein, normal. Peripheral blood chromosomes showed no abnormalities, and no microdeletions were found in Y chromosome by G-banding and real-time PCR. Moreover, no abnormalities were observed on examination of semen at another hospital. The semen examination revealed a semen volume of 3.5 mL, sperm density of 125.8 million/mL, and sperm viability of 67.5%. Sperm morphology modified by Papanicolaou staining showed that 4% of sperm exhibited a normal morphology (Supplementary Figure 1A–1C). Additionally, sperm acrosin was 25 mIU/mL, and electron microscopy analysis revealed the presence of the sperm acrosome.

We collected twenty-four eggs (23 at the stage of two pronuclei and one at the germinal vesicle stage) after treating the patient's wife by *in vitro* fertilization (IVF) due to tubal factor. We found that sperm could enter the ZP, but could not fuse with the egg within the short insemination period (Supplementary Movie 1). Accordingly, we then considered rescue ICSI and performed a sperm-egg crossover experiment after obtaining permission from the interim ethics committee of our institution. The patient's sperm still could not fuse with a third-party egg by normal

*in vitro* fertilization. Then the eggs of the patient's wife were normally fertilized using ICSI, yielding nine high-quality embryos (one was excellent) on the third day. In order to avoid excessive ovarian stimulation, two of the frozen embryos were transplanted on August 2016, resulting in a successful pregnancy.

### WES analysis of the patient

Patient description analysis revealed the abnormality in the sperm. Thus, we focused on the rare variants in the proband identified by whole-exome sequencing. We filtered out polymorphisms with allele frequency greater than 0.1% in the dbSNP, 1000 Genomes, ESP6500siv2 and ExAC databases, and a list of genes harboring homozygous/heterozygous sequence variants were analyzed. Among these genes and rare variants, *ADAM20* is abundantly and specifically expressed in testis (Figure 2A). Importantly, *ADAM20* belonged to ADAM protein family, several members of which are involved in binding to egg plasma membrane [3]. Therefore, we hypothesized that the rare variant in *ADAM20* was associated with sperm-egg fusion disorder. By means of Sanger sequencing, the heterozygous variant in *ADAM20* (NM\_003814:exon2:c.641A>C:p.D214A), was confirmed in the patient (Figure 1B). The proband inherited this variant from his mother, while his unaffected father did not carry this rare variant.

### *In silico* analysis of the *ADAM20* variant

*In silico* analysis predicted that the *ADAM20* variant c.641A>C is possibly a deleterious mutation by PROVEAN (Table 1). This variant is a novel variant absent from the gnomAD and 1000 Genomes databases, respectively (Table 1), and it is also with extremely low allele frequency in ExAC database (Table 1), which is consistent with the rarity of this disorder. The variant site D214 was highly conserved from human to mouse, indicating an important role of this site (Figure 1C).

### *ADAM20* with D214A mutation mislocalized in the sperm head

To further verify the pathogenicity of the D214A variant, we analyzed *ADAM20* protein expression in spermatozoa from the patient and control by immunostaining. *ADAM20* protein was localized as ring-structure around the sperm head in normal control (Figure 2B and 2C). Besides, the acrosome region was also stained with relative weak signal of *ADAM20* in control sperm (Figure 2C). However, in the patient, both the ring-structure and acrosome staining disappeared in the sperm head (Figure 2B and 2C). Therefore, the distribution of *ADAM20* protein in the patient suggested that the D214A mutation might affect the localization of *ADAM20*.

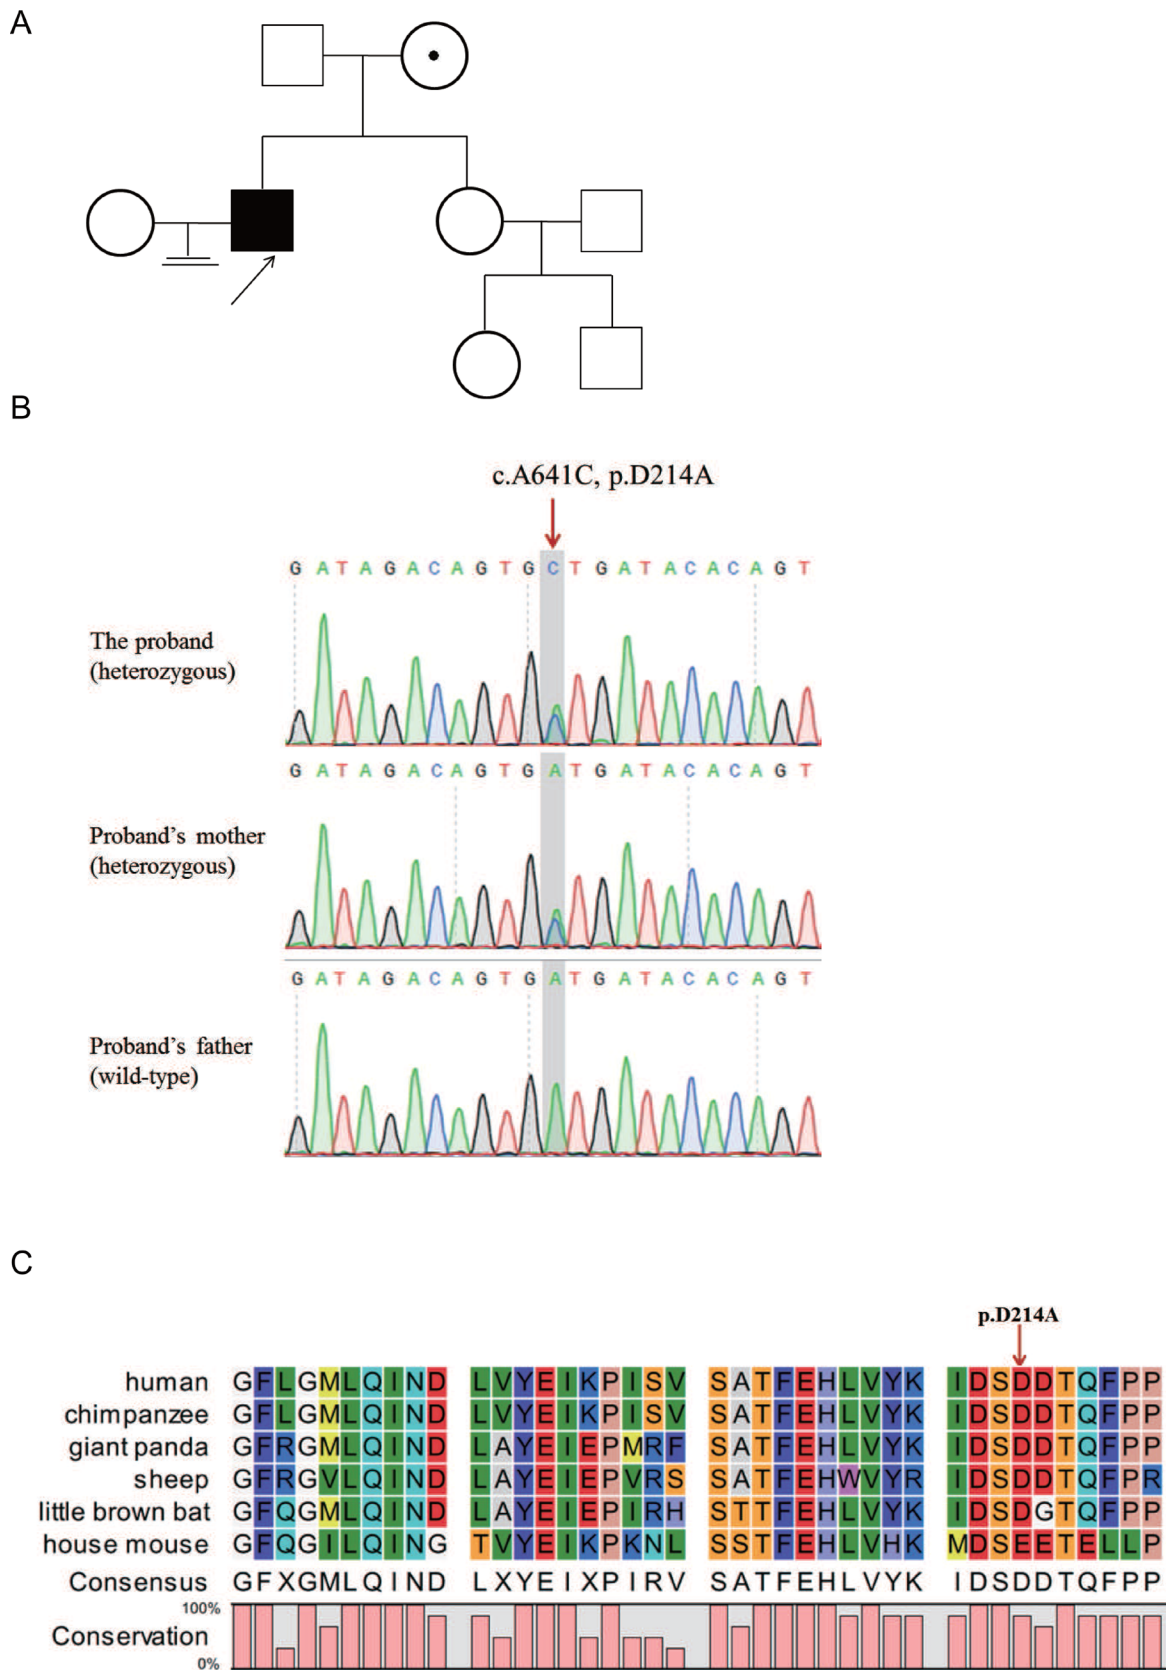

**Figure 1: A patient with sperm-egg fusion disorder in a family.** (A) Family tree of the patient. The black arrow points to the proband. (B) Sanger sequencing confirmed the *ADAM20* variant in the proband. The proband carried a heterozygous *ADAM20* mutation (c.A641C). The patient's mother carried heterozygous allele, and his father harbored the wild-type sequence. The red arrow points to the variant site. (C) Alignment of *ADAM20* protein in different species. The red arrow points to the D214 amino acid.

**Table 1: *In silico* analysis of *ADAM20* mutation**

| Mutation | Amino acid change | Polyphen-2 <sup>a</sup> | SIFT <sup>b</sup> | PROVEAN <sup>c</sup> | Mutation Taster <sup>d</sup> | SNPs&GO <sup>e</sup> | ExAC (total) <sup>f</sup> | ExAC (East Asian) <sup>g</sup> | 1000 Genomes <sup>h</sup> | gnomAD <sup>i</sup> |
|----------|-------------------|-------------------------|-------------------|----------------------|------------------------------|----------------------|---------------------------|--------------------------------|---------------------------|---------------------|
| c.A641C  | p.D214A           | Benign (0.014)          | Tolerated (0.058) | Damaging (-3.59)     | Polymorphism (0.9999)        | Neutral (0.140)      | 0.00002035                | 0.0002899                      | 0                         | 0                   |

<sup>a</sup>Polyphen-2 (<http://genetics.bwh.harvard.edu/pph2/>). Prediction Scores range from 0 to 1 with high scores indicating probably or possibly damaging.

<sup>b</sup>SIFT, i.e., Sorting Intolerant From Tolerant (<http://sift.jcvi.org/>). Scores vary between 0 and 1. Variants with scores close or equal to 0 are predicted to be damaging.

<sup>c</sup>PROVEAN ([http://provean.jcvi.org/protein\\_batch\\_submit.php?species=human](http://provean.jcvi.org/protein_batch_submit.php?species=human)). Variants with scores lower than -2.5 (cutoff) are predicted to be deleterious.

<sup>d</sup>Mutation Taster (<http://www.mutationtaster.org/>). The probability value is the probability of the prediction, i.e., a value close to 1 indicates a high 'security' of the prediction.

<sup>e</sup>SNPs&GO (<http://snps.biofold.org/snps-and-go/>). Probability: Disease probability (if >0.5 mutation is predicted Disease).

<sup>f</sup>Frequency of variation in total of ExAC database.

<sup>g</sup>Frequency of variation in East Asian population of ExAC database.

<sup>h</sup>Frequency of variation in 1000 Genomes database.

<sup>i</sup>Frequency of variation in total of gnomAD (genome Aggregation Database, a big database containing 123,136 exome sequences and 15,496 whole-genome sequences).

## DISCUSSION

We report here a rare mutation, p.D214A, of the *ADAM20* in a male patient with sperm-egg fusion disorder. The localization of mutated *ADAM20* protein changed, with the ring-structure and acrosome staining disappearing. While this mutation appeared to affect sperm-egg binding and fusion, it did not affect later embryonic development or clinical pregnancy.

*ADAM20* was a testis-specific expressed gene [8]. *ADAM20* was closely related to *ADAM1* and *ADAM2* [8]. Because of the human *ADAM1* gene is non-functional [9], it is speculated that *ADAM20* may play the same role and substitute for *ADAM1* in human sperm [8, 10]. Therefore, *ADAM20* is a good candidate to participate in human gamete membrane adhesion and fusion, which is also supported by our finding that in the normal spermatozoa *ADAM20* expressed in the head, especially in the putative acrosome region.

The D214A mutation is located in the pro-domain, which is not contained in the mature peptide of *ADAM20*. *ADAM20* and *ADAM21* were suggested to form a heterodimer complex. The mature complex was formed by cleavage of the pro-domain. Some *ADAMs* have the propeptide cleavage sites (RXKR and RRRR), while *ADAM20* did not have an obvious cleavage site [3]. We speculated that some residues in the pro-domain under positive selection are of great importance for the normal function of *ADAM20* and thus for sperm-egg fusion. A sequence (aa219-aa227) called "cysteine switch", which is a short motif with an unpaired cysteine that is thought to interact with Zn<sup>2+</sup> in the catalytic domain [8, 11], is near the D214 site. This switch suggested that *ADAM20* requires proteolytic processing [8]. Therefore, we postulated that D214A may affect the function of proteolytic processing by interfering the interaction between cysteine switch motif and the catalytic domain. However, whether D214 site plays function in the heterodimerization, propeptide cleavage or secretion of the mature dimers needs to be further analyzed.

Mutations in *ADAMs* that have the dominant negative effects have been reported previously. EGFR transactivation induced by Ang II was inhibited in vascular smooth muscle

cells infected by a dominant negative *ADAM17* (E406A) [12]. The same dominant-negative *ADAM17* adenovirus-treated carotid artery can markedly inhibit intimal hyperplasia [13]. Dominant negative *ADAM10* (E384A) resulted in a decreased expression of *ADAM10* [14]. So we hypothesized that the D214A mutation may possibly exert a dominant negative effect on *ADAM20* function.

In conclusion, our study demonstrated for the first time that a mutation of *ADAM20*, may be associated with sperm-egg fusion disorder by affecting the localization of *ADAM20* in the sperm head. However, this mutation did not affect early embryonic development and pregnant outcome if ICSI was carried out. Therefore, this study aids the IVF scientists to solve the sperm-egg fusion disorder and provides researchers with a new insight into the understanding the molecular mechanism of sperm-egg fusion process.

## MATERIALS AND METHODS

### Patient

The patient and his family were recruited from Xiamen Maternity and Child Care Hospital. This study was approved by the Ethics Committee of Xiamen Maternity and Child Care Hospital. Written informed consent was obtained and then 5 mL of peripheral blood was collected from each participant.

### Whole-exome sequencing (WES) analysis and validation by Sanger sequencing

WES was performed as previously described [15]. Full whole-exome sequencing data of the patient is available upon request. Sanger sequencing was used to validate the mutation of *ADAM20* in the proband, and in his mother and father.

### Immunostaining of spermatozoa

Immunostaining was performed as previously described [16]. The information of primary rabbit anti-*ADAM20* antibody was listed in Supplementary Table 1.

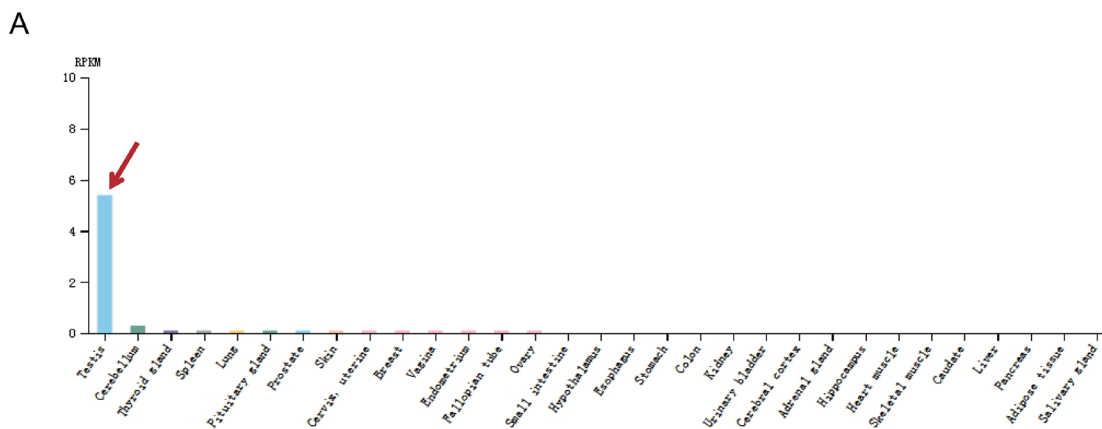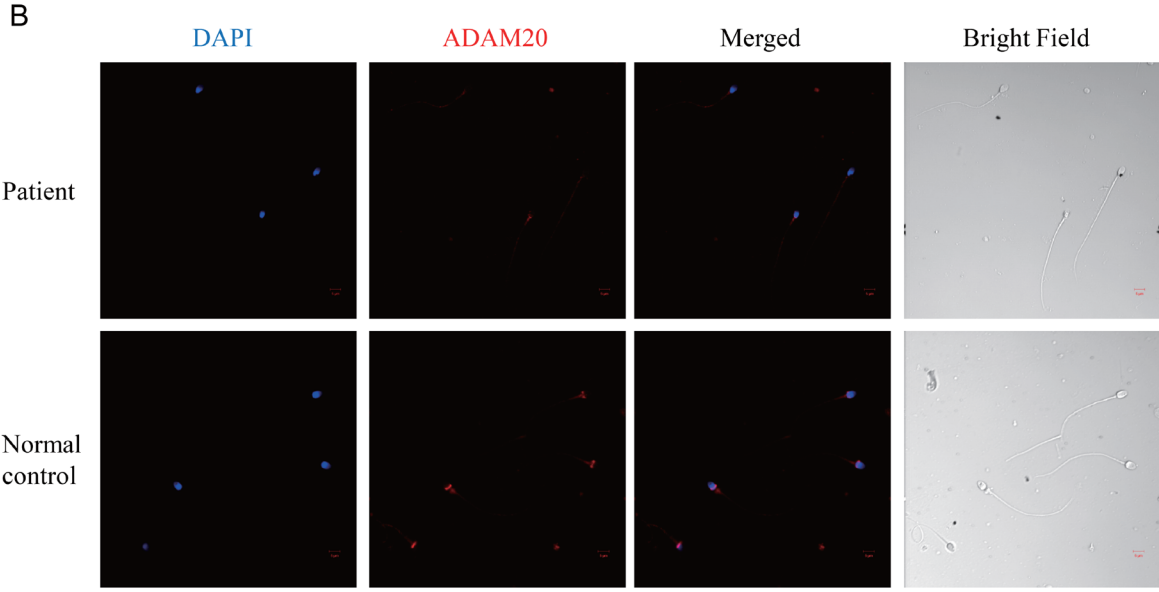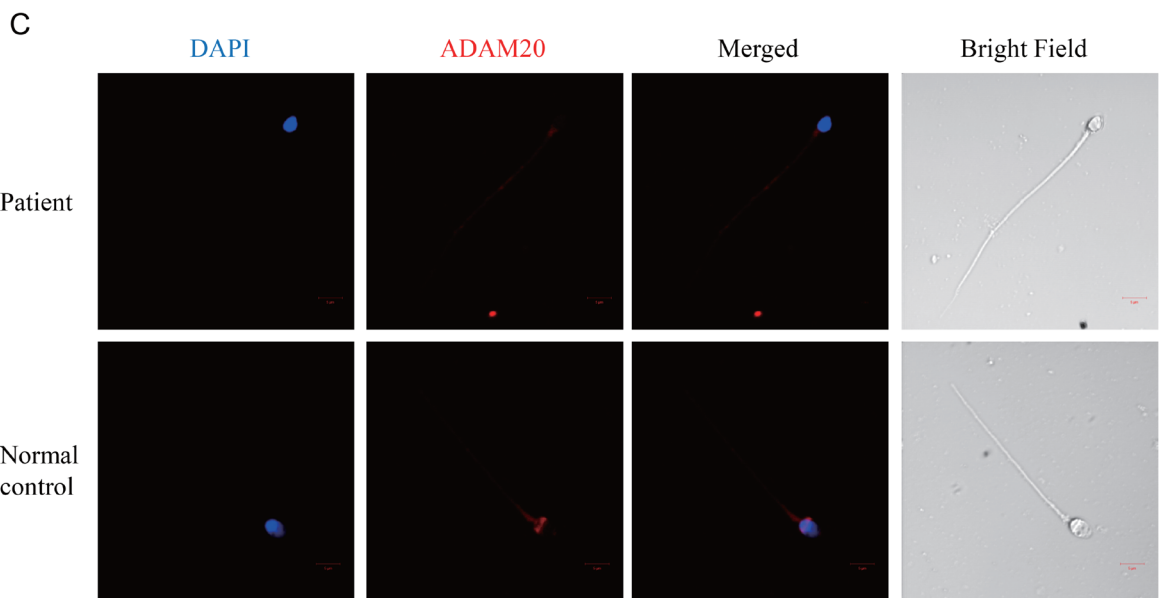

**Figure 2: The expression pattern of ADAM20 changed in the patient's spermatozoa. (A)** *ADAM20* was highly and specifically expressed in human testis. The data was from the online database, <http://www.proteinatlas.org/ENSG00000134007-ADAM20/tissue>. The red arrow points to the expression level of *ADAM20* in testis. **(B)** Immunostaining of *ADAM20* in the sperm of both the patient and normal control. The *ADAM20* protein was stained in red. **(C)** Enlarged pictures of immunostaining of *ADAM20* in the sperm of both the patient and normal control.

## Author contributions

ZY.J. and YW.S. carried out the majority of experiments; L.L., YW.S. performed the WES data analysis and *in silico* analysis of sequence variants; Samples of the patient and his relatives were collected by YW.S., P.L., ZY.J., L.B.M., P.P.Q., H.J.; L.L., W.W.L., and YW.S. designed experiments and wrote the manuscript.

## ACKNOWLEDGMENTS

We thank the participants described in this report for their consent and support to publish this manuscript. We also thank the experts from Editage for their hard work on the redaction.

## CONFLICTS OF INTEREST

The authors declare no conflicts of interest.

## FUNDING

The study was supported by the Youth Scientific Research Project of Fujian Provincial Health and Family Planning Commission [Grant No. 2015-2-52 and 2016-2-72], the Science and Technology Project of Fujian Province [Grant No. 2015D018, 2016D10 and 2017D011], the Xiamen Science and Technology Planning Project [Grant No. 3502Z20154033], the Major/Important Disease Research Project [Grant No. 3502Z20159022], the Beijing Municipal Administration of Hospitals Clinical Medicine Development [Grant No. ZYLX201510], the Beijing Municipal Administration of Hospitals' Ascent Plan [Grant No. DFL20151301], the Beijing Obstetrics and Gynecology Hospital, Capital Medical University [Grant No. fcy201506], the Young/Middle-aged Talent Cultivation Project [Grant No. 2015-ZQN-JC-44], and the Open Project of Key Laboratory of Male Reproductive and Genetics, National Health and Family Planning Commission [Grant No. KF201704].

## REFERENCES

1. Fawcett DW. The mammalian spermatozoon. *Dev Biol.* 1975; 44:394–436.
2. Wassarman PM, Jovine L, Litscher ES. A profile of fertilization in mammals. *Nat Cell Biol.* 2001; 3:E59–64.
3. Stone AL, Kroeger M, Sang QX. Structure-function analysis of the ADAM family of disintegrin-like and metalloproteinase-containing proteins (review). *J Protein Chem.* 1999; 18:447–465.
4. Inoue N, Ikawa M, Isotani A, Okabe M. The immunoglobulin superfamily protein Izumo is required for sperm to fuse with eggs. *Nature.* 2005; 434:234–238.
5. Da Ros VG, Maldera JA, Willis WD, Cohen DJ, Goulding EH, Gelman DM, Rubinstein M, Eddy EM, Cuasnicu PS. Impaired sperm fertilizing ability in mice lacking Cysteine-Rich Secretory Protein 1 (CRISP1). *Dev Biol.* 2008; 320:12–18.
6. Benoff S, Cooper GW, Hurley I, Napolitano B, Rosenfeld DL, Scholl GM, Hershlag A. Human sperm fertilizing potential *in vitro* is correlated with differential expression of a head-specific mannose-ligand receptor. *Fertil Steril.* 1993; 59:854–862.
7. Evans JP, Schultz RM, Kopf GS. Roles of the disintegrin domains of mouse fertilins alpha and beta in fertilization. *Biol Reprod.* 1998; 59:145–152.
8. Hooft van Huijsduijnen R. ADAM 20 and 21; two novel human testis-specific membrane metalloproteases with similarity to fertilin-alpha. *Gene.* 1998; 206:273–282.
9. Jury JA, Frayne J, Hall L. The human fertilin alpha gene is non-functional: implications for its proposed role in fertilization. *Biochem J.* 1997; 321:577–581.
10. Evans JP. The molecular basis of sperm-oocyte membrane interactions during mammalian fertilization. *Hum Reprod Update.* 2002; 8:297–311.
11. Grams F, Huber R, Kress LF, Moroder L, Bode W. Activation of snake venom metalloproteinases by a cysteine switch-like mechanism. *FEBS Lett.* 1993; 335:76–80.
12. Ohtsu H, Dempsey PJ, Frank GD, Brailoiu E, Higuchi S, Suzuki H, Nakashima H, Eguchi K, Eguchi S. ADAM17 mediates epidermal growth factor receptor transactivation and vascular smooth muscle cell hypertrophy induced by angiotensin II. *Arterioscler Thromb Vasc Biol.* 2006; 26:e133-137.
13. Takaguri A, Kimura K, Hinoki A, Bourne AM, Autieri MV, Eguchi S. A disintegrin and metalloprotease 17 mediates neointimal hyperplasia in vasculature. *Hypertension.* 2011; 57:841–845.
14. Soundararajan R, Sayat R, Robertson GS, Marignani PA. Triptolide: An inhibitor of a disintegrin and metalloproteinase 10 (ADAM10) in cancer cells. *Cancer Biol Ther.* 2009; 8:2054–2062.
15. Li L, Sha YW, Wang X, Li P, Wang J, Kee K, Wang BB. Whole-exome sequencing identified a homozygous BRDT mutation in a patient with acephalic spermatozoa. *Oncotarget.* 2017; 8:19914–19922. <https://doi.org/10.18632/oncotarget.15251>.
16. Sha YW, Xu X, Mei LB, Li P, Su ZY, He XQ, Li L. A homozygous CEP135 mutation is associated with multiple morphological abnormalities of the sperm flagella (MMAF). *Gene.* 2017; 633:48–53.
